# Supplementary material for: A novel and effective benzo[d]thiazole-based fluorescent probe with dual recognition factors for highly sensitive and selective imaging of cysteine in vitro and in vivo
Source: Royal Society of Chemistry journal article supplement (doi:10.1039/c9nj03202a), 2019-01-01
Supplement: c9nj03202a1.pdf [file c9nj03202a1.pdf]

## Supplementary Information

### **A novel and effective benzo[d]thiazole-based fluorescent probe with dual recognition factors for highly sensitive and selective imaging of cysteine in vitro and in vivo**

Meiqing Zhu,<sup>‡a</sup> Xiaoqin Wu,<sup>‡a</sup> Linfeng Sang,<sup>a</sup> Fugang Fan,<sup>a</sup> Lijun Wang,<sup>a</sup> Xiangwei Wu,<sup>a</sup> Rimao Hua,<sup>a</sup> Yi Wang,<sup>a\*</sup> Qing X. Li<sup>b</sup>

<sup>a</sup> *Key Laboratory of Agri-food Safety of Anhui Province, School of Resources and Environment, Anhui Agricultural University, Hefei 230036, China*

<sup>b</sup> *Department of Molecular Bioscience and Bioengineering, University of Hawaii, 1955 East-West Road, Honolulu, HI 96822, USA*

## Table of Content

|                                                                          |    |
|--------------------------------------------------------------------------|----|
| 1. Characterization of <b>BT-OH</b> and <b>BT-AC</b> .....               | 3  |
| 2. Optimization of experimental conditions.....                          | 5  |
| 3. Study on reaction mechanism of <b>BT-AC</b> with Cys.....             | 6  |
| 4. Practical application potential of <b>BT-AC</b> .....                 | 11 |
| 5. The program of gradient elution in LC-HRMS.....                       | 12 |
| 6. Comparison of <b>BT-AC</b> with other fluorescent probes for Cys..... | 13 |
| 7. References.....                                                       | 15 |

## 1. Characterization of BT-OH and BT-AC

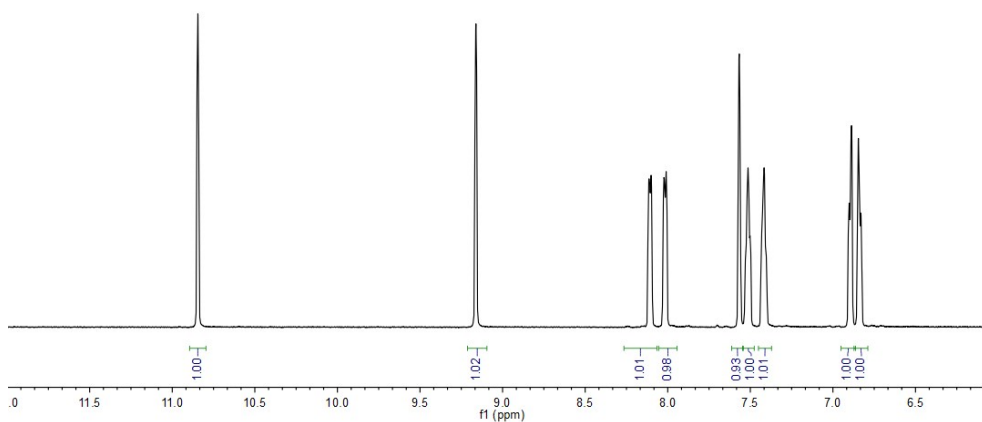

**Figure S1.** <sup>1</sup>H-NMR spectra of BT-OH

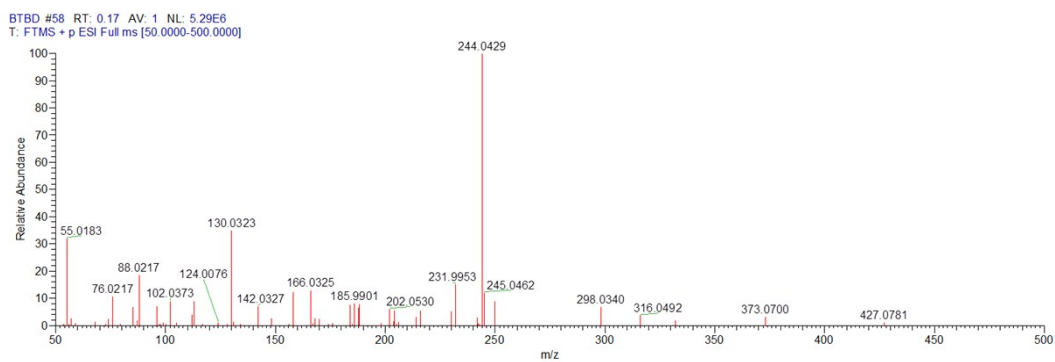

**Figure S2.** LC-HRMS spectra of BT-OH

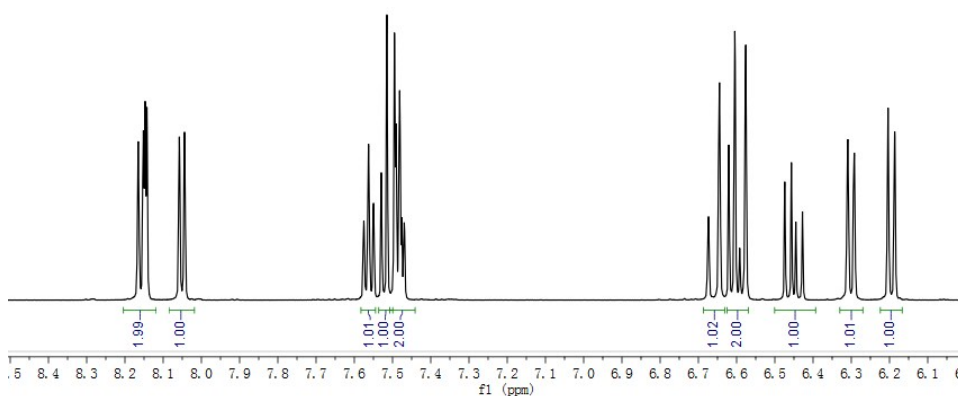

**Figure S3.** <sup>1</sup>H-NMR spectra of BT-AC

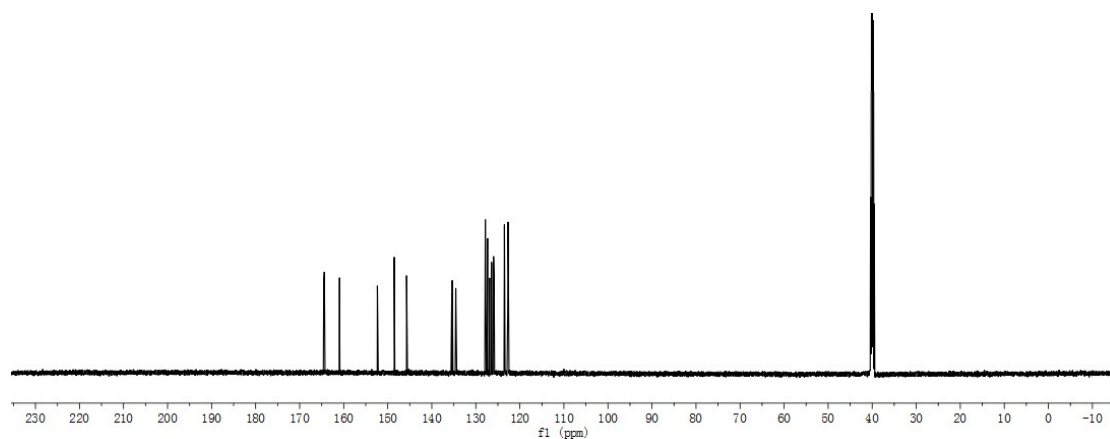

**Figure S4.**  $^{13}\text{C}$ -NMR spectra of BT-AC

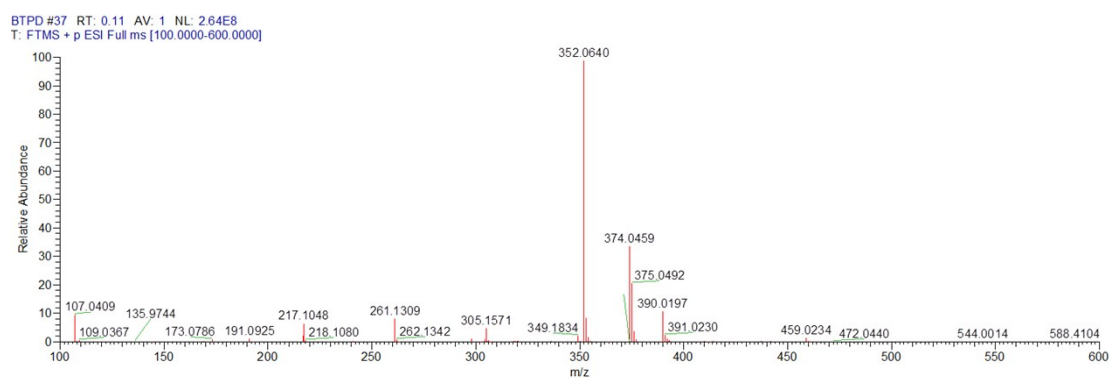

**Figure S5.** LC-HRMS spectra of BT-AC

## 2. Optimization of experimental conditio

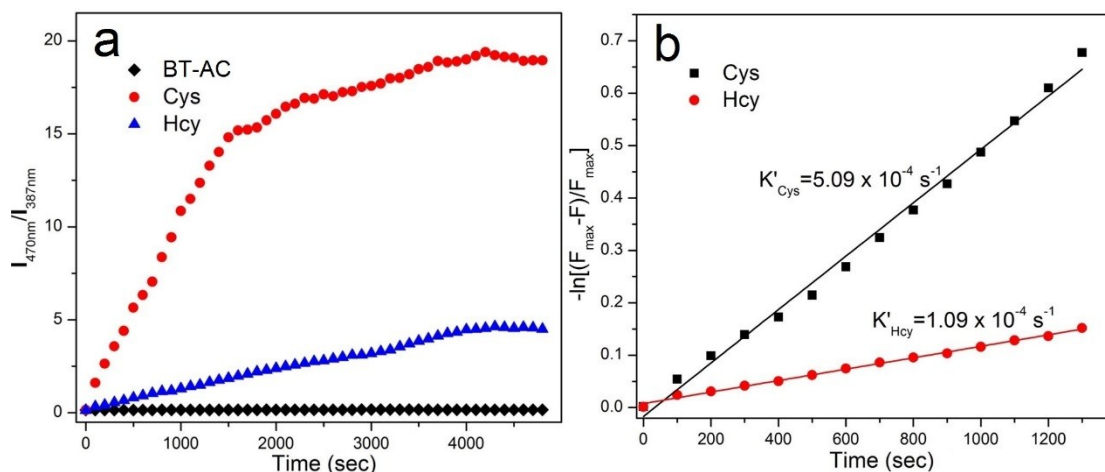

Fig S6. Time-dependent fluorescence ratiometric response ( $I_{470\text{nm}}/I_{387\text{nm}}$ ) and pseudo-first-order kinetic plots of **BT-AC** (10  $\mu\text{M}$ ) at 470 nm with and without biothiols (200  $\mu\text{M}$ ) in DMSO-HEPES buffer solution (7:3, v/v, pH 7.4,  $\lambda_{\text{ex}} = 335 \text{ nm}$ ).

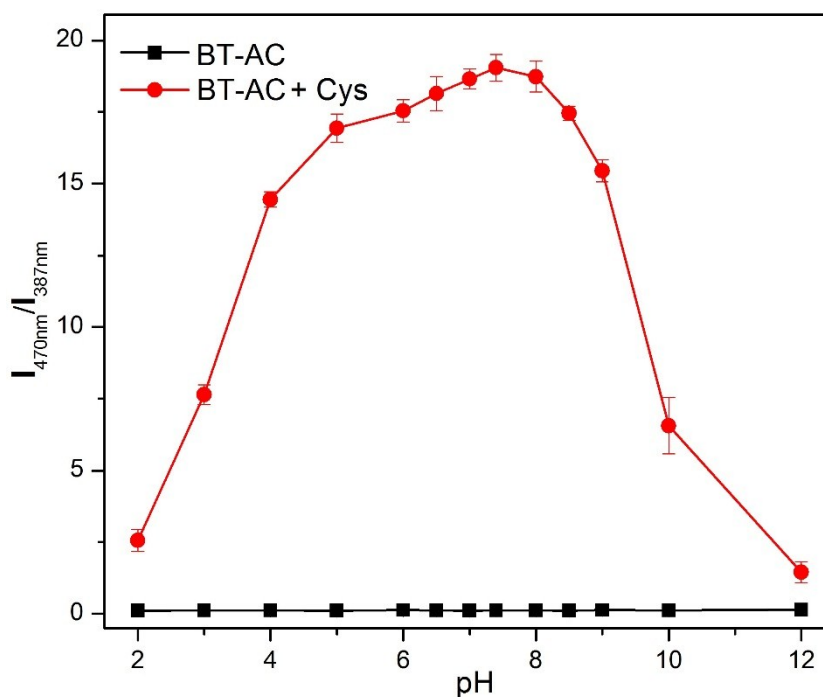

**Figure S7.** Ratiometric response ( $I_{470\text{nm}}/I_{387\text{nm}}$ ) of **BT-AC** (10  $\mu\text{M}$ ) with or without biothiols (200  $\mu\text{M}$ ) in DMSO-HEPES buffer solution (**BT-AC** 10 mM, pH = 2, 3, 4, 5, 6, 6.5, 7, 7.4, 8, 8.5, 9, 9.5, 10 and 12,  $\lambda_{\text{ex}} = 335 \text{ nm}$ , slit: 10.0 nm). Data are mean  $\pm$  SE (bars) (n = 3).

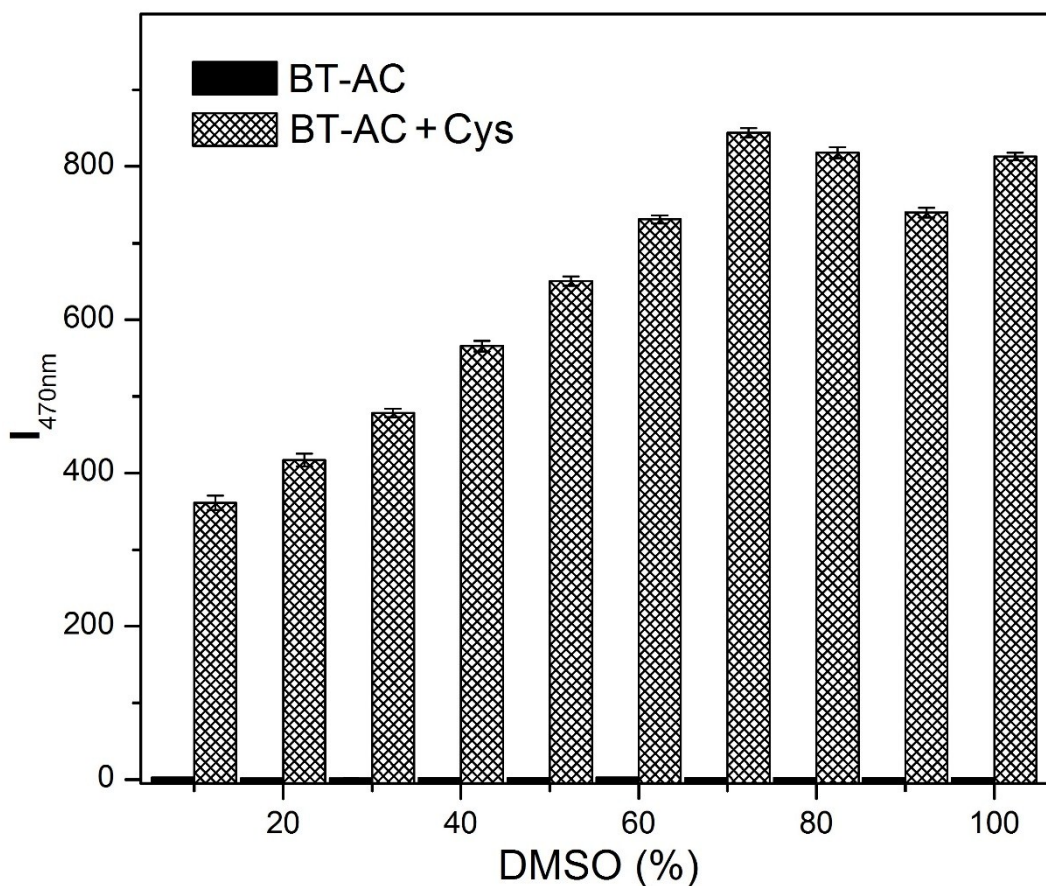

**Figure S8.** Fluorescence response of BT-AC (10 μM) without and with bi thiols (200 μM) in HEPES buffer solution with different ratios of DMSO and HEPES. (pH 7.4,  $\lambda_{\text{ex}} = 335$  nm, slit: 10.0 nm). Data are mean  $\pm$  SE (bars) (n = 3).

### 3. Study on reaction mechanism of BT-AC with Cys/Hcy

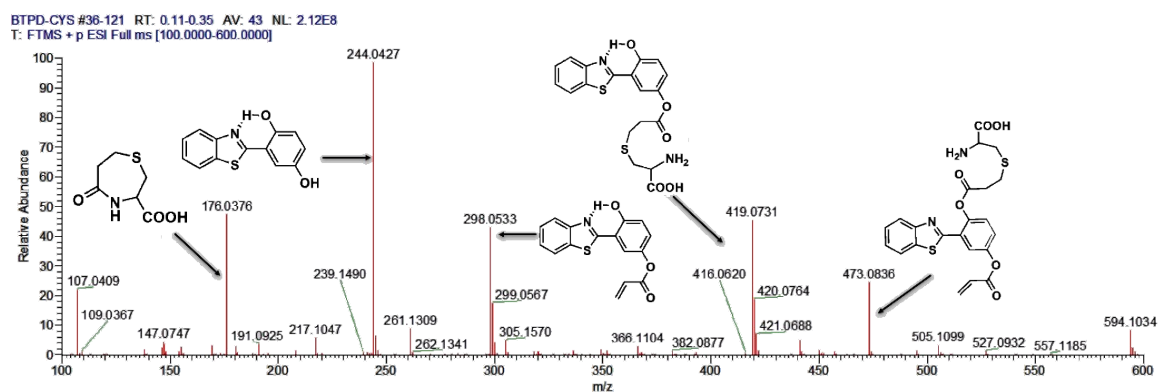

**Figure S9.** LC- HRMS spectrum of the products of the reaction between BT-AC and Cys

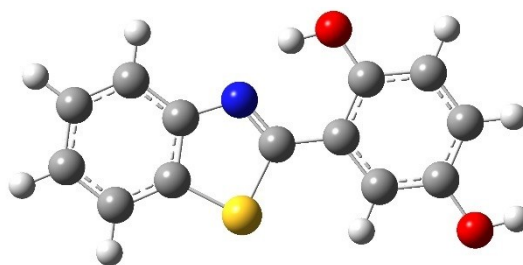

**Figure S10.** Optimized structure of probe **BT-OH**.

%chk=1

%mem=8gb

%nproc=4

# b3lyp/6-31g\*\* cube=orbitals

Title Card Required

|   |          |          |          |
|---|----------|----------|----------|
| C | -4.00162 | -0.62551 | -0.30079 |
| C | -2.60668 | -0.86214 | -0.30112 |
| C | -1.71769 | 0.22216  | -0.30121 |
| C | -2.23378 | 1.51251  | -0.30098 |
| C | -3.62116 | 1.73592  | -0.30066 |
| C | -4.51917 | 0.67069  | -0.30056 |
| C | -3.28135 | -2.99823 | -0.30116 |
| H | -0.64804 | 0.03745  | -0.30147 |
| H | -1.55547 | 2.36084  | -0.30105 |
| H | -4.00200 | 2.75316  | -0.30048 |
| H | -5.59048 | 0.84698  | -0.30031 |
| N | -2.24602 | -2.19633 | -0.30133 |
| S | -4.85456 | -2.15829 | -0.30074 |
| C | -3.17065 | -4.45046 | -0.30132 |
| C | -4.31818 | -5.2672  | -0.30104 |
| C | -1.8853  | -5.06101 | -0.30178 |
| C | -4.21537 | -6.65048 | -0.30118 |
| H | -5.31072 | -4.82723 | -0.30007 |
| C | -1.80146 | -6.46072 | -0.30191 |

|   |          |          |          |
|---|----------|----------|----------|
| C | -2.94522 | -7.24668 | -0.30161 |
| H | -0.81427 | -6.91105 | -0.30224 |
| H | -2.85407 | -8.33152 | -0.30171 |
| O | -0.73061 | -4.36629 | -0.30203 |
| O | -5.37928 | -7.3778  | -0.30088 |
| H | -0.95597 | -3.40077 | -0.30183 |
| H | -5.15948 | -8.32176 | -0.30108 |

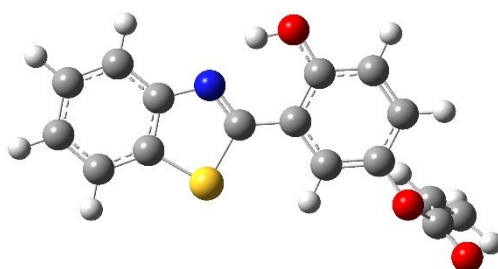

**Figure S11.** Optimized structure of probe **BT-OH-AC**.

%chk=1

%mem=8gb

%nproc=4

# b3lyp/6-31g\*\* cube=orbitals

Title Card Required

|   |          |          |          |
|---|----------|----------|----------|
| C | -3.34053 | 0.05144  | 0.38569  |
| C | -2.23037 | -0.43764 | -0.34177 |
| C | -1.25198 | 0.45481  | -0.80272 |
| C | -1.39999 | 1.80921  | -0.53038 |
| C | -2.50743 | 2.28428  | 0.19317  |
| C | -3.48877 | 1.41222  | 0.65888  |
| C | -3.26074 | -2.39546 | 0.00743  |
| H | -0.40126 | 0.07583  | -1.36022 |
| H | -0.64962 | 2.51162  | -0.88116 |



|   |          |          |          |
|---|----------|----------|----------|
| H | -2.6018  | 3.34747  | 0.39409  |
| H | -4.34214 | 1.78309  | 1.21808  |
| N | -2.223   | -1.80693 | -0.53222 |
| S | -4.386   | -1.28557 | 0.82847  |
| C | -3.482   | -3.83443 | -0.05415 |
| C | -4.6151  | -4.42822 | 0.53573  |
| C | -2.5399  | -4.66858 | -0.72134 |
| C | -4.8128  | -5.79629 | 0.47374  |
| H | -5.3495  | -3.82253 | 1.05794  |
| C | -2.75985 | -6.05606 | -0.76328 |
| C | -3.87748 | -6.61955 | -0.16808 |
| H | -2.02207 | -6.67077 | -1.26816 |
| H | -4.03308 | -7.69394 | -0.18611 |
| O | -1.43347 | -4.19882 | -1.31872 |
| O | -5.89959 | -6.34972 | 1.14371  |
| C | -6.97966 | -6.89822 | 0.48311  |
| O | -7.78014 | -7.52584 | 1.13222  |
| C | -7.09536 | -6.6424  | -0.97919 |
| H | -6.38284 | -5.97717 | -1.45378 |
| C | -8.07627 | -7.22227 | -1.67623 |
| H | -8.19746 | -7.04545 | -2.74081 |
| H | -8.78148 | -7.88836 | -1.1875  |
| H | -1.41361 | -3.21257 | -1.19898 |

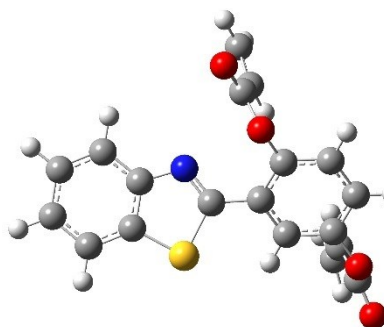

**Figure S12.** Optimized structure of probe **BT-AC**.

%chk=1

%mem=8gb

%nproc=4

# b3lyp/6-31g\*\* cube=orbitals

Title Card Required

|   |          |          |          |
|---|----------|----------|----------|
| C | -3.04472 | -0.58653 | 0.42656  |
| C | -1.90272 | -1.23284 | -0.10802 |
| C | -0.85719 | -0.46723 | -0.64624 |
| C | -0.96955 | 0.91661  | -0.64147 |
| C | -2.10881 | 1.54716  | -0.10906 |
| C | -3.15677 | 0.80598  | 0.4302   |
| C | -3.01172 | -3.05614 | 0.50112  |
| H | 0.01619  | -0.97101 | -1.04746 |
| H | -0.16691 | 1.5225   | -1.05169 |
| H | -2.17369 | 2.63151  | -0.11586 |
| H | -4.03222 | 1.29867  | 0.8417   |
| N | -1.9247  | -2.61331 | -0.05027 |
| S | -4.15998 | -1.79129 | 1.03401  |
| C | -3.32725 | -4.47856 | 0.69597  |
| C | -4.66348 | -4.91273 | 0.69912  |
| C | -2.31408 | -5.44315 | 0.89418  |
| C | -4.97735 | -6.25717 | 0.87816  |
| H | -5.46645 | -4.19738 | 0.55169  |
| C | -2.64369 | -6.78479 | 1.09363  |
| C | -3.97157 | -7.20214 | 1.081    |
| H | -1.83977 | -7.49085 | 1.2745   |
| H | -4.23781 | -8.24215 | 1.23777  |
| O | -0.99226 | -5.0773  | 1.04344  |
| O | 1.02904  | -4.62188 | 0.25454  |

|   |          |          |          |
|---|----------|----------|----------|
| C | -0.101   | -4.9422  | -0.00967 |
| C | -0.59673 | -5.26378 | -1.37366 |
| C | 0.26229  | -5.32949 | -2.39328 |
| H | -0.06833 | -5.56379 | -3.40074 |
| H | -1.65606 | -5.44602 | -1.51476 |
| H | 1.3208   | -5.14426 | -2.23585 |
| O | -6.29722 | -6.67222 | 0.94987  |
| C | -7.17603 | -6.5746  | -0.11463 |
| O | -8.35393 | -6.68939 | 0.11297  |
| C | -6.58766 | -6.39064 | -1.46865 |
| H | -5.51072 | -6.44561 | -1.5832  |
| C | -7.38888 | -6.18152 | -2.51688 |
| H | -6.99178 | -6.06387 | -3.52063 |
| H | -8.46571 | -6.12602 | -2.38642 |

#### 4. Practical application potential of BT-AC

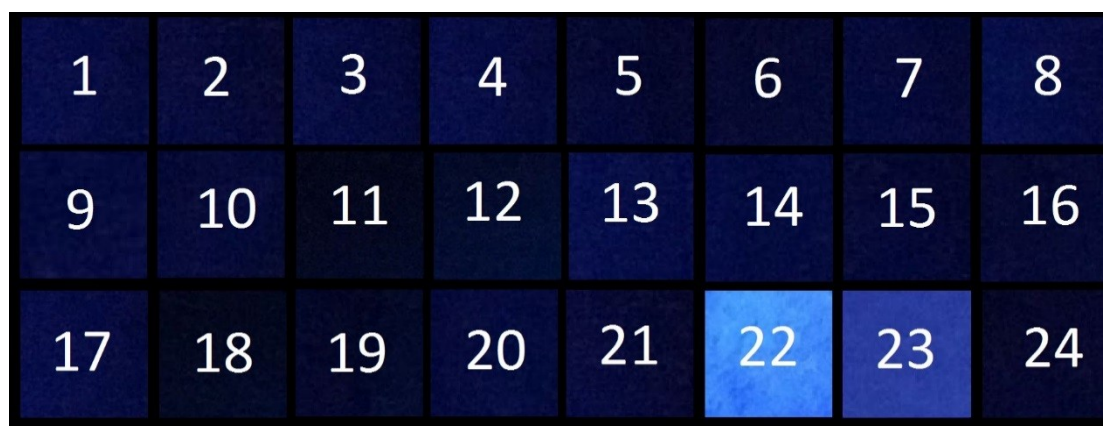

**Figure S13.** Fluorescence changes in test paper (under a 365 nm UV lamp) with probe **BT-AC** upon addition of some representative analytes (1. **BT-AC**; 2. buffer; 3. Pro; 4. Asp; 5. Try; 6. Arg; 7. Tyr; 8. His; 9. Glu; 10. Lys; 11. Thr, 12. glucose; 13. K<sup>+</sup>; 14. Ca<sup>2+</sup>; 15. Na<sup>+</sup>; 16. Mg<sup>2+</sup>; 17. Zn<sup>2+</sup>; 18. Fe<sup>3+</sup>; 19. Cu<sup>2+</sup>; 20. H<sub>2</sub>O<sub>2</sub>; 21. NaHS; 22. Cys; 23. Hcy; 24. GSH).

## 5. The program of gradient elution in LC-HRMS

**Table S1.** The program of gradient elution in LC-HRMS.

| Time<br>(min) | Flow rate (mL/min) | %A  | %B  | curve |
|---------------|--------------------|-----|-----|-------|
| 0.25          | 0.3                | 95% | 5%  | 6     |
| 3             | 0.3                | 60% | 40% | 6     |
| 5             | 0.3                | 5%  | 95% | 6     |
| 7             | 0.3                | 5%  | 95% | 6     |
| 8             | 0.3                | 95% | 5%  | 11    |
| 10            | 0.3                | 95% | 5%  | 11    |

## 6. Comparison of BT-AC with other fluorescent probes for Cys

**Table S2.** Comparison of several recent reported probes for the detection of Cys.

| Probe                                                                               | Molecular weight | Stoke shift (nm) | Solvent (pH=7.4)      | Excitation and Emission wavelength                                  | Reaction sites                   | Time (min) | Detection Limit ( $\mu\text{M}$ ) | Reference |
|-------------------------------------------------------------------------------------|------------------|------------------|-----------------------|---------------------------------------------------------------------|----------------------------------|------------|-----------------------------------|-----------|
| 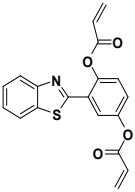   | 351.4            | 135              | DMSO-HEPES (7/3, v/v) | $E_x = 335 \text{ nm}$ ,<br>$E_m = 470 \text{ nm}$                  | acrylate group                   | 20         | 0.032                             | This work |
|    | 703.6            | 160              | DMSO-HEPES (4/6, v/v) | $E_x = 350 \text{ nm}$ ,<br>$E_m = 430 \text{ nm}/510 \text{ nm}$ , | 2,4-dinitrobenzenesulfonyl group | 20         | 0.17-0.40                         | 1         |
|   | 504.5            | 71               | CTAB buffer           | $E_x = 562 \text{ nm}$ ,<br>$E_m = 621 \text{ nm}$                  | acrylate group                   | 20         | 0.20                              | 2         |
|  | 440.4            | 70               | EtOH-water (2/3, v/v) | $E_x = 450 \text{ nm}$ ,<br>$E_m = 520 \text{ nm}$                  | acrylate group                   | 60         | 0.50                              | 3         |

|                                                                                     |       |    |                                                    |                                                    |                                |     |       |   |
|-------------------------------------------------------------------------------------|-------|----|----------------------------------------------------|----------------------------------------------------|--------------------------------|-----|-------|---|
| 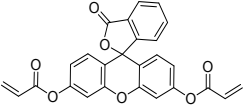   | 440.4 | 37 | EtOH-PBS<br>(2/8, v/v)                             | $E_x = 478 \text{ nm}$ ,<br>$E_m = 515 \text{ nm}$ | acrylate group                 | 15  | 0.077 | 4 |
|    | 348.4 | 35 | CH <sub>3</sub> CN-<br>HEPES (2/8,<br>v/v)         | $E_x = 470 \text{ nm}$ ,<br>$E_m = 565 \text{ nm}$ | acrylate group                 | 90  | 0.158 | 5 |
|    | 440.2 | 30 | CH <sub>3</sub> CN-H <sub>2</sub> O<br>(1:1, v/v)  | $E_x = 503 \text{ nm}$ ,<br>$E_m = 525 \text{ nm}$ | acrylate group                 | 150 | 0.037 | 6 |
|    | 306.4 | 60 | HEPES (0.01 M,<br>pH 7.4)<br>containing 1%<br>DMSO | $E_x = 475 \text{ nm}$ ,<br>$E_m = 535 \text{ nm}$ | p-<br>aminophenylthi<br>oether | 60  | 0.1   | 7 |
|  | 550.7 | 95 | PBS / DMSO<br>(2/1, v / v)                         | $E_x = 497 \text{ nm}$ ,<br>$E_m = 590 \text{ nm}$ | Carbazole and<br>benzoindeole  | 10  | 0.06  | 8 |

## 7. References

1. M.Q. Zhu, X.N Liu, Y.N Yang, L.J. Wang, X.Q. Wu, S.S. Fan, Z. Wang, R.M. Hua, Y. Wang and Q. X. Li, *J Mol Liq*, 2019, **287**, 111016.
2. X. F. Yang, Y. X. Guo and R. M. Strongin, *Org Biomol Chem*, 2012, **10**, 2739-2741.
3. L. G. Wang, Q. Zhou, B. C. Zhu, L. G. Yan, Z. M. Ma, B. Du and X. L. Zhang, *Dyes Pigments*, 2012, **95**, 275-279.
4. H. L. Wang, G. D. Zhou, H. W. Gai and X. Q. Chen, *Chem Commun*, 2012, **48**, 8341-8343.
5. H. R. Lu, H. T. Zhang, J. Chen, J. C. Zhang, R. C. Liu, H. Y. Sun, Y. L. Zhao, Z. F. Chai and Y. Hu, *Talanta*, 2016, **146**, 477-482.
6. W. L. Fan, X. M. Huang, X. M. Shi, Z. Wang, Z. L. Lu, C. H. Fan and Q. B. Bo, *Spectrochim Acta A*, 2017, **173**, 918-923.
7. Q. Wang, F. T. Ma, W. Q. Tang, S. L. Zhao, C. J. Li and Y. S. Xie, *Dyes Pigments*, 2018, **148**, 437-443.
8. D. Y. Lee, G. M. Kim, J. Yin and J. Yoon, *Chem Commun*, 2015, **51**, 6518-6520.
9. M. Y. Li, P. C. Cui, K. Li, J. H. Feng, M. M. Zou and X. Q. Yu, *Chinese Chem Lett*, 2018, **29**, 992-994.
